# Supplementary material for: Microbiomes of Various Maternal Body Systems Are Predictive of Calf Digestive Bacterial Ecology
Source: MDPI journal article supplement (doi:10.3390/ani11082210), 2021-07-26
Supplement: s1 [file s1]

## SUPPLEMENTAL INFORMATION

**Table S1** Kruskal-Wallis H test pairwise results based on sample type using alpha diversity measures Shannon entropy and Simpson's Index.

| Sample Type 1 | Sample Type 2 | Shannon Entropy<br><i>P</i> – value <sup>1</sup> | Simpson's Index<br><i>P</i> – value <sup>1</sup> |
|---------------|---------------|--------------------------------------------------|--------------------------------------------------|
| Placenta      | Colostrum     | 0.500                                            | 0.500                                            |
| Placenta      | Vagina        | 0.010                                            | 0.010                                            |
| Placenta      | Oral          | 0.006                                            | 0.006                                            |
| Placenta      | Cow Fecal     | 0.008                                            | 0.008                                            |
| Placenta      | Meconium      | 0.006                                            | 0.006                                            |
| Placenta      | 24 h Fecal    | 0.006                                            | 0.006                                            |
| Placenta      | 7 d Fecal     | 0.006                                            | 0.006                                            |
| Placenta      | 42 d Fecal    | 0.006                                            | 0.006                                            |
| Placenta      | 60 d Fecal    | 0.006                                            | 0.006                                            |
| Colostrum     | Vagina        | 0.010                                            | 0.010                                            |
| Colostrum     | Oral          | 0.006                                            | 0.006                                            |
| Colostrum     | Cow Fecal     | 0.050                                            | 0.050                                            |
| Colostrum     | Meconium      | 0.020                                            | 0.020                                            |
| Colostrum     | 24 h Fecal    | 0.004                                            | 0.004                                            |
| Colostrum     | 7 d Fecal     | 0.004                                            | 0.004                                            |
| Colostrum     | 42 d Fecal    | 0.004                                            | 0.004                                            |
| Colostrum     | 60 d Fecal    | 0.004                                            | 0.004                                            |
| Vagina        | Oral          | 0.700                                            | 0.700                                            |
| Vagina        | Cow Fecal     | 0.010                                            | 0.010                                            |
| Vagina        | Meconium      | 0.010                                            | 0.010                                            |
| Vagina        | 24 h Fecal    | 0.060                                            | 0.060                                            |
| Vagina        | 7 d Fecal     | 0.800                                            | 0.800                                            |
| Vagina        | 42 d Fecal    | 0.999                                            | 0.800                                            |
| Vagina        | 60 d Fecal    | 0.700                                            | 0.700                                            |
| Oral          | Cow Fecal     | 0.020                                            | 0.020                                            |
| Oral          | Meconium      | 0.020                                            | 0.020                                            |
| Oral          | 24 h Fecal    | 0.004                                            | 0.004                                            |
| Oral          | 7 d Fecal     | 0.100                                            | 0.100                                            |
| Oral          | 42 d Fecal    | 0.300                                            | 0.300                                            |
| Oral          | 60 d Fecal    | 0.400                                            | 0.400                                            |
| Cow Fecal     | Meconium      | 0.900                                            | 0.700                                            |
| Cow Fecal     | 24 h Fecal    | 0.004                                            | 0.004                                            |
| Cow Fecal     | 7 d Fecal     | 0.004                                            | 0.004                                            |
| Cow Fecal     | 42 d Fecal    | 0.004                                            | 0.004                                            |
| Cow Fecal     | 60 d Fecal    | 0.004                                            | 0.004                                            |
| Meconium      | 24 h Fecal    | 0.004                                            | 0.004                                            |
| Meconium      | 7 d Fecal     | 0.004                                            | 0.004                                            |
| Meconium      | 42 d Fecal    | 0.004                                            | 0.004                                            |
| Meconium      | 60 d Fecal    | 0.004                                            | 0.004                                            |
| 24 h Fecal    | 7 d Fecal     | 0.010                                            | 0.008                                            |

|            |            |       |       |
|------------|------------|-------|-------|
| 24 h Fecal | 42 d Fecal | 0.004 | 0.004 |
| 24 h Fecal | 60 d Fecal | 0.004 | 0.004 |
| 7 d Fecal  | 42 d Fecal | 0.050 | 0.050 |
| 7 d Fecal  | 60 d Fecal | 0.020 | 0.020 |
| 42 d Fecal | 60 d Fecal | 0.800 | 0.800 |

---

<sup>1</sup>A *P*-value  $\leq 0.05$  was considered significant.

---

**Table S2** Permutational Analysis of Variance (PERMANOVA) pairwise comparison results based on sample type using Weighted Unifrac distances.

| Sample Type 1 | Sample Type 2 | Pseudo-f statistic | Bonferonni <i>P</i> – value <sup>1</sup> |
|---------------|---------------|--------------------|------------------------------------------|
| Placenta      | Colostrum     | 2.071              | 0.999                                    |
| Placenta      | Vagina        | 6.093              | 0.714                                    |
| Placenta      | Oral          | 10.224             | 0.097                                    |
| Placenta      | Cow Fecal     | 11.906             | 0.097                                    |
| Placenta      | Meconium      | 6.408              | 0.097                                    |
| Placenta      | 24 h Fecal    | 16.495             | 0.097                                    |
| Placenta      | 7 d Fecal     | 9.981              | 0.097                                    |
| Placenta      | 42 d Fecal    | 9.601              | 0.097                                    |
| Placenta      | 60 d Fecal    | 10.572             | 0.097                                    |
| Colostrum     | Vagina        | 4.702              | 0.214                                    |
| Colostrum     | Oral          | 7.883              | 0.097                                    |
| Colostrum     | Cow Fecal     | 9.284              | 0.097                                    |
| Colostrum     | Meconium      | 6.140              | 0.097                                    |
| Colostrum     | 24 h Fecal    | 10.747             | 0.097                                    |
| Colostrum     | 7 d Fecal     | 7.659              | 0.097                                    |
| Colostrum     | 42 d Fecal    | 7.418              | 0.097                                    |
| Colostrum     | 60 d Fecal    | 8.084              | 0.097                                    |
| Vagina        | Oral          | 3.194              | 0.999                                    |
| Vagina        | Cow Fecal     | 4.611              | 0.214                                    |
| Vagina        | Meconium      | 2.445              | 0.999                                    |
| Vagina        | 24 h Fecal    | 12.008             | 0.214                                    |
| Vagina        | 7 d Fecal     | 3.625              | 0.999                                    |
| Vagina        | 42 d Fecal    | 2.424              | 0.999                                    |
| Vagina        | 60 d Fecal    | 3.016              | 0.643                                    |
| Oral          | Cow Fecal     | 14.984             | 0.097                                    |
| Oral          | Meconium      | 6.932              | 0.195                                    |
| Oral          | 24 h Fecal    | 6.953              | 0.097                                    |
| Oral          | 7 d Fecal     | 3.105              | 0.999                                    |
| Oral          | 42 d Fecal    | 4.535              | 0.999                                    |
| Oral          | 60 d Fecal    | 6.109              | 0.584                                    |
| Cow Fecal     | Meconium      | 2.085              | 0.999                                    |
| Cow Fecal     | 24 h Fecal    | 77.318             | 0.097                                    |
| Cow Fecal     | 7 d Fecal     | 14.099             | 0.097                                    |
| Cow Fecal     | 42 d Fecal    | 9.707              | 0.097                                    |
| Cow Fecal     | 60 d Fecal    | 8.474              | 0.097                                    |
| Meconium      | 24 h Fecal    | 21.121             | 0.097                                    |
| Meconium      | 7 d Fecal     | 6.941              | 0.097                                    |
| Meconium      | 42 d Fecal    | 4.252              | 0.097                                    |
| Meconium      | 60 d Fecal    | 3.623              | 0.195                                    |
| 24 h Fecal    | 7 d Fecal     | 9.944              | 0.097                                    |
| 24 h Fecal    | 42 d Fecal    | 17.294             | 0.097                                    |

|            |            |        |       |
|------------|------------|--------|-------|
| 24 h Fecal | 60 d Fecal | 26.499 | 0.097 |
| 7 d Fecal  | 42 d Fecal | 3.221  | 0.974 |
| 7 d Fecal  | 60 d Fecal | 4.998  | 0.195 |
| 42 d Fecal | 60 d Fecal | 0.857  | 0.999 |

---

<sup>1</sup>A Bonferroni corrected  $P$ -value  $\leq 0.05$  was considered significant.

---

**Table S3** Relative abundance of phyla within microbiome of each sample type from multiparous Holstein cows (n = 6) and their calves (n =6; bulls = 3, heifers =3).

| Phylum           | Placenta | Colostrum | Vagina <sup>1</sup> | Oral     | Cow Fecal | Meconium | 24 h Fecal | 7 d Fecal | 42 d Fecal | 60 d Fecal |
|------------------|----------|-----------|---------------------|----------|-----------|----------|------------|-----------|------------|------------|
| Crenarchaeota    | 0.000    | 0.000     | 0.000               | 0.000    | 0.000     | 0.005    | 0.000      | 0.000     | 0.000      | 1.560E-4   |
| Euryarchaeota    | 0.414    | 0.000     | 0.114               | 0.059    | 1.025     | 0.232    | 0.000      | 0.000     | 0.024      | 0.232      |
| {Unknown Phylum} | 0.000    | 0.000     | 0.001               | 1.100E-4 | 3.360E-4  | 0.000    | 0.000      | 0.000     | 0.000      | 0.000      |
| Bacteria-1       | 0.000    | 0.000     | 0.001               | 4.380E-4 | 0.009     | 0.002    | 0.000      | 0.000     | 0.000      | 0.000      |
| {Unknown Phylum} | 0.000    | 0.000     | 0.001               | 4.380E-4 | 0.009     | 0.002    | 0.000      | 0.000     | 0.000      | 0.000      |
| Bacteria-2       | 0.000    | 0.000     | 0.016               | 0.021    | 0.002     | 0.006    | 0.000      | 0.000     | 0.000      | 0.000      |
| [Thermi]         | 0.000    | 0.000     | 0.006               | 0.008    | 0.005     | 0.061    | 0.000      | 1.000E-4  | 2.870E-4   | 1.560E-4   |
| Acidobacteria    | 0.000    | 0.000     | 0.006               | 0.008    | 0.005     | 0.061    | 0.000      | 1.000E-4  | 2.870E-4   | 1.560E-4   |
| Actinobacteria   | 19.729   | 2.049     | 0.476               | 1.150    | 1.280     | 1.149    | 0.003      | 6.500     | 0.914      | 0.487      |
| Armatimonadetes  | 0.000    | 0.000     | 0.000               | 0.000    | 0.000     | 0.004    | 0.000      | 0.000     | 0.000      | 0.000      |
| Bacteroidetes    | 15.510   | 1.177     | 8.057               | 16.013   | 48.812    | 42.554   | 0.043      | 43.362    | 49.352     | 45.575     |
| BRC1             | 0.000    | 0.000     | 0.000               | 0.001    | 0.000     | 0.001    | 0.000      | 0.000     | 0.000      | 0.000      |
| Chlamydiae       | 0.000    | 0.000     | 0.000               | 3.290E-4 | 0.000     | 0.000    | 0.000      | 0.000     | 0.000      | 0.000      |
| Chlorobi         | 0.000    | 0.000     | 4.940E-4            | 0.001    | 0.000     | 0.000    | 0.000      | 0.000     | 0.000      | 0.000      |
| Chloroflexi      | 0.000    | 0.000     | 0.017               | 0.020    | 0.005     | 0.094    | 7.050E-5   | 2.010E-4  | 0.001      | 0.001      |
| Cyanobacteria    | 0.050    | 0.000     | 0.119               | 0.213    | 0.969     | 0.585    | 7.050E-5   | 2.010E-4  | 0.753      | 0.257      |
| Deferribacteres  | 0.000    | 0.000     | 0.000               | 0.000    | 0.003     | 0.000    | 0.000      | 0.000     | 0.000      | 0.000      |
| Elusimicrobia    | 0.000    | 0.000     | 0.000               | 0.001    | 0.030     | 0.002    | 0.000      | 1.000E-4  | 0.000      | 0.253      |
| FBP              | 0.000    | 0.000     | 3.290E-4            | 0.001    | 0.000     | 0.001    | 0.000      | 0.000     | 0.000      | 0.000      |
| Fibrobacteres    | 0.000    | 0.000     | 0.003               | 0.010    | 0.048     | 0.128    | 0.000      | 0.000     | 0.000      | 0.000      |
| Firmicutes       | 15.961   | 0.599     | 20.043              | 10.504   | 40.153    | 20.502   | 14.847     | 27.153    | 24.050     | 32.975     |
| Fusobacteria     | 0.013    | 0.000     | 0.317               | 0.191    | 0.001     | 0.003    | 0.001      | 3.830     | 0.127      | 0.007      |
| Gemmatimonadetes | 0.000    | 0.000     | 0.003               | 0.002    | 0.000     | 0.022    | 0.000      | 0.000     | 0.000      | 0.000      |
| GN02             | 0.000    | 0.000     | 0.001               | 0.012    | 0.000     | 0.000    | 0.000      | 0.000     | 0.000      | 0.000      |
| GN04             | 0.000    | 0.000     | 0.000               | 1.100E-4 | 0.000     | 0.000    | 0.000      | 0.000     | 0.000      | 0.000      |
| LD1              | 0.000    | 0.000     | 0.000               | 0.000    | 0.001     | 0.000    | 0.000      | 0.000     | 0.000      | 0.000      |
| Lentisphaerae    | 0.000    | 0.000     | 0.063               | 0.078    | 0.145     | 0.127    | 2.470E-4   | 1.510E-4  | 0.000      | 0.003      |
| Nitrospirae      | 0.000    | 0.000     | 0.000               | 1.100E-4 | 0.001     | 0.014    | 7.050E-5   | 0.000     | 0.000      | 0.000      |
| NKB19            | 0.000    | 0.000     | 0.000               | 3.290E-4 | 3.360E-4  | 0.001    | 0.000      | 0.000     | 0.000      | 0.000      |
| OD1              | 0.000    | 0.000     | 0.002               | 0.003    | 0.000     | 0.012    | 0.000      | 0.000     | 0.000      | 0.000      |
| OP11             | 0.000    | 0.000     | 0.001               | 0.002    | 0.000     | 0.000    | 0.000      | 0.000     | 0.000      | 0.000      |
| Planctomycetes   | 0.006    | 0.000     | 0.036               | 0.032    | 0.067     | 0.081    | 1.060E-4   | 0.000     | 0.000      | 0.000      |
| Proteobacteria   | 47.702   | 96.153    | 57.843              | 69.330   | 2.373     | 30.859   | 85.104     | 19.144    | 23.902     | 11.327     |
| Spirochaetes     | 0.233    | 0.011     | 0.050               | 0.179    | 1.355     | 0.627    | 4.580E-4   | 0.001     | 0.002      | 8.320      |
| Synergistetes    | 0.000    | 0.000     | 0.000               | 0.000    | 0.002     | 0.000    | 0.000      | 0.000     | 0.000      | 0.001      |

|                 |       |       |        |          |       |       |          |          |       |          |
|-----------------|-------|-------|--------|----------|-------|-------|----------|----------|-------|----------|
| Tenericutes     | 0.276 | 0.000 | 12.147 | 1.777    | 0.436 | 0.921 | 0.001    | 3.010E-4 | 0.875 | 0.562    |
| TM6             | 0.000 | 0.000 | 0.000  | 1.640E-4 | 0.000 | 0.000 | 0.000    | 0.000    | 0.000 | 0.000    |
| TM7             | 0.000 | 0.000 | 0.000  | 0.001    | 0.000 | 0.001 | 0.000    | 0.000    | 0.000 | 0.000    |
| Verrucomicrobia | 0.107 | 0.011 | 0.681  | 0.388    | 3.279 | 2.006 | 3.530E-4 | 0.009    | 0.000 | 1.560E-4 |
| WPS-2           | 0.000 | 0.000 | 0.002  | 0.001    | 0.000 | 0.001 | 0.000    | 0.000    | 0.000 | 0.000    |
| WWE1            | 0.000 | 0.000 | 0.000  | 1.640E-4 | 0.001 | 0.000 | 0.000    | 0.000    | 0.000 | 0.000    |

---

<sup>1</sup>Vaginal canal samples were only obtained from 4 Holstein cow-calf pairs.

---
